# Supplementary material for: A simple method to measure methane emissions from indoor gas leaks
Source: PubMed Central journal article supplement (PMC10688665; doi:10.1371/journal.pone.0295055), 2023-11-30
Supplement: pone.0295055.s001.pdf [file pone.0295055.s001.pdf]

## S1 Appendix: Selected Building Locations and Characteristics

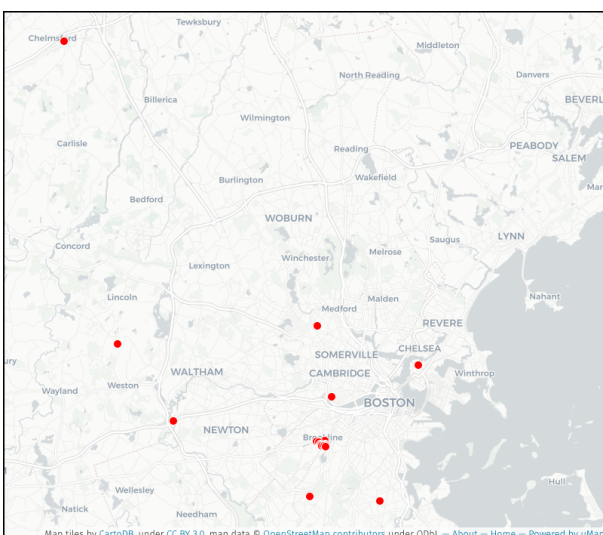

Figure 1. Map of locations of buildings studied

Table 1. General locations of buildings studied

| City or Town Location                  | Buildings |
|----------------------------------------|-----------|
| Boston (Dorchester neighborhood)       | 1         |
| Boston (Roslindale neighborhood)       | 1         |
| Brookline                              | 10        |
| Cambridge (Cambridgeport neighborhood) | 1         |
| Chelmsford                             | 1         |
| East Boston                            | 1         |
| Newton (Auburndale neighborhood)       | 1         |
| Somerville (West Somerville)           | 1         |
| Weston                                 | 1         |

Table 2. General characteristics of the buildings in the study

| Experiment location name | Single-family or multi-family home | Building occupant(s) are owners or renters | Number of families in studied building                        | Home age (years) | Approximate subterranean level of basement (%) | Basement empty volume ( $V_{empty}$ ) (ft <sup>3</sup> )                                | Basement adjusted volume ( $V_{adj}$ ) (ft <sup>3</sup> ) |
|--------------------------|------------------------------------|--------------------------------------------|---------------------------------------------------------------|------------------|------------------------------------------------|-----------------------------------------------------------------------------------------|-----------------------------------------------------------|
| R1                       | single                             | Owners                                     | 1                                                             | 96               | 37.5                                           | 4559                                                                                    | 4418                                                      |
| R2                       | single                             | Owners                                     | 1                                                             | 202              | 85                                             | 2388                                                                                    | 2184                                                      |
| R3                       | single                             | (See R4)                                   | (See R4)                                                      | (See R4)         | (attic)                                        | 814                                                                                     | 702                                                       |
| R4                       | single                             | Owners                                     | 1                                                             | 17               | 90                                             | 1110                                                                                    | 1083                                                      |
| R5                       | single                             | Owners                                     | 1                                                             | 63               | 85                                             | (Basement air CH <sub>4</sub> concentration below threshold - experiment not performed) |                                                           |
| R6                       | multi                              | Both                                       | 2                                                             | 122              | 80                                             | 8399                                                                                    | 8283                                                      |
| R7                       | multi                              | (see R6)                                   | (see R6)                                                      | (see R6)         | (see R6)                                       | 2256                                                                                    | 2169                                                      |
| R8                       | single                             | Owners                                     | 1                                                             | 102              | 80                                             | 4282                                                                                    | 3931                                                      |
| R9                       | single                             | Owners                                     | 1                                                             | 112              | 85                                             | 6787                                                                                    | 5707                                                      |
| R10                      | multi                              | Both                                       | 2                                                             | 152              | 85                                             | 6452                                                                                    | 5830                                                      |
| R11                      | multi                              | Both                                       | 2 in left side (in study) plus 2 in right side (not in study) | 38               | 80                                             | 4472                                                                                    | 4274                                                      |

|     |        |         |                   |     |      |                                                                                         |      |
|-----|--------|---------|-------------------|-----|------|-----------------------------------------------------------------------------------------|------|
| R12 | single | Owners  | 1                 | 102 | 85   | 3653                                                                                    | 3517 |
| R13 | single | Owners  | 1                 | 96  | 75   | 3758                                                                                    | 3234 |
| R14 | single | Renters | 1                 | 67  | 25   | (Basement air CH <sub>4</sub> concentration below threshold - experiment not performed) |      |
| R15 | multi  | Both    | 3                 | 102 | 50   | 8549                                                                                    | 7842 |
| R16 | single | Owners  | 1                 | 93  | 85   | 3674                                                                                    | 3471 |
| R17 | multi  | Both    | 3                 | 109 | 80   | 6933                                                                                    | 5764 |
| R18 | multi  | Both    | 2, left side only | 128 | 80   | 5220                                                                                    | 4669 |
| R19 | single | Owners  | 1                 | 171 | 72.5 | 2971                                                                                    | 2829 |
| R20 | single | Owners  | 1                 | 122 | 80   | 4215                                                                                    | 3835 |
| R21 | single | Owners  | 1                 | 122 | 50   | 3606                                                                                    | 3225 |
| R22 | single | Owners  | 1                 | 140 | 80   | (Basement air CH <sub>4</sub> concentration below threshold - experiment not performed) |      |
