# Supplementary material for: A simple method to measure methane emissions from indoor gas leaks
Source: PubMed Central journal article supplement (PMC10688665; doi:10.1371/journal.pone.0295055), 2023-11-30
Supplement: pone.0295055.s007.pdf [file pone.0295055.s007.pdf]

## S7 Appendix: Leaks

### S7 Appendix section 1: Leak locations by floor or location relative to natural gas meter

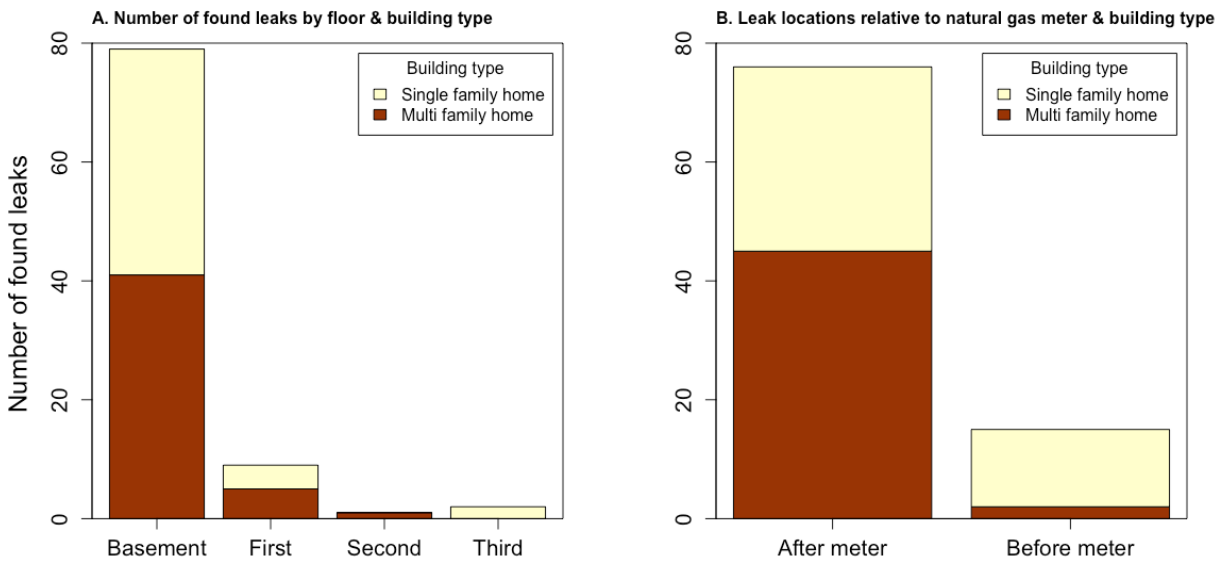

Figure 18. Leak locations

### S7 Appendix section 2: Leak sources

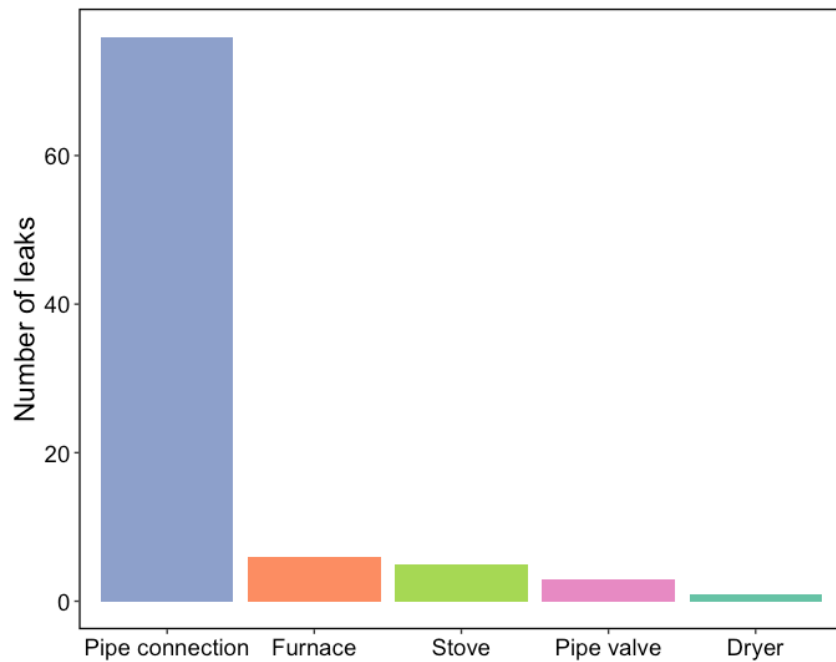

Figure 19. Leak sources
