# Supplementary material for: A simple method to measure methane emissions from indoor gas leaks
Source: PubMed Central journal article supplement (PMC10688665; doi:10.1371/journal.pone.0295055), 2023-11-30
Supplement: pone.0295055.s008.pdf [file pone.0295055.s008.pdf]

**S8 Appendix: Building age relationships**

Building age didn't appear to predict the number of surveyed leaks found ( $R^2 = 0.088$ ,  $n=13$ ,  $p=0.326$ ), RCM simple slope calculated flux ( $R^2 = 0.028$ ,  $p=0.537$ ,  $n=16$ ), or the sum of leakage as quantified by the CGI ( $R^2=0.08$ ,  $n=13$ ,  $p=0.348$ ).

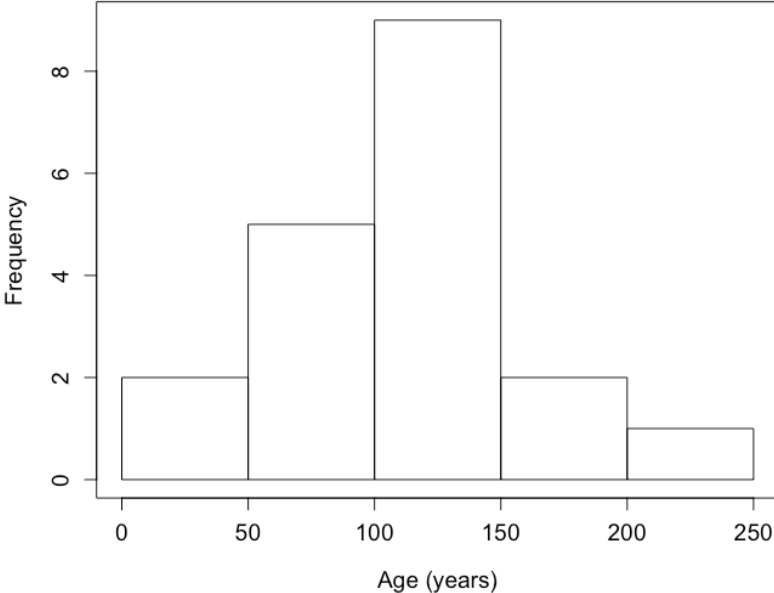

**Figure 20.** Histogram of ages of buildings studies (n=19)
