# Supplementary material for: A simple method to measure methane emissions from indoor gas leaks
Source: PubMed Central journal article supplement (PMC10688665; doi:10.1371/journal.pone.0295055), 2023-11-30
Supplement: pone.0295055.s009.pdf [file pone.0295055.s009.pdf]

## S9 Appendix: Instrument Quality Control Tests

### S9 Appendix section 1: Picarro GasScouter G4301 Analyzer cavity ring-down spectrometer

We used a GasScouter for i) air CH<sub>4</sub> data logging during RCM and the bag method experiments ii) ambient air CH<sub>4</sub> concentration measurements on each floor of buildings and for outside baseline atmospheric measurements iii) analyzing the bag method air samples iv) metered control testing. The performance specification sheet [from Picarro](#) for the GasScouter is below.

**Table 5.** GasScouter performance specifications (copied directly from Picarro, Inc.)

| Picarro G4301 GasScouter Performance Specifications |                                                     |                                                  |                         |
|-----------------------------------------------------|-----------------------------------------------------|--------------------------------------------------|-------------------------|
| Specification                                       | CO <sub>2</sub>                                     | CH <sub>4</sub>                                  | H <sub>2</sub> O        |
| Raw precision (5 sec)                               | 0.4 ppm + 0.1% of reading<br>Typical = 0.15 ppm*    | 3 ppb + 0.1% of reading<br>Typical = 0.8 ppb*    | 100 ppm + 5% of reading |
| Precision (300 sec, 1 σ)                            | 0.04 ppm + 0.02% of reading<br>Typical = 0.025 ppm* | 0.3 ppb + 0.02% of reading<br>Typical = 0.1 ppb* | 10 ppm + 5% of reading  |
| Lower Detection Limit (300 sec, 3σ)                 | 0.12 ppm<br>Typical = 0.075 ppm*                    | 0.9 ppb<br>Typical = 0.3 ppb*                    | –                       |
| Drift (24 hr, peak-to-peak 50 min average)          | 0.5 ppm<br>Typical = 0.18 ppm*                      | 1 ppb<br>Typical = 0.56 ppb*                     | –                       |
| Measurement Range                                   | 0–3%                                                | 0–800 ppm                                        | 0–3% (non-condensing)   |
| Measurement Interval                                | 3 sec                                               |                                                  |                         |
| Response Time<br>(Rise/Fall Time 10–90% / 90–10%)   | 5 sec                                               |                                                  |                         |

\*Typical performance is defined as the median of testing results from 29 sequentially built G4301 analyzers measured at ambient concentration levels.

We measured an average data logging rate of 1.09 data points per second. To test the GasScouter, a Tedlar bag was fully evacuated and filled with a test gas. The bag was then attached to the Scout intake. We performed quality control tests using 3 different test gasses on September 17 2022. The GasScouter measured CH<sub>4</sub> concentrations to within 1.1% of test gasses as shown below.

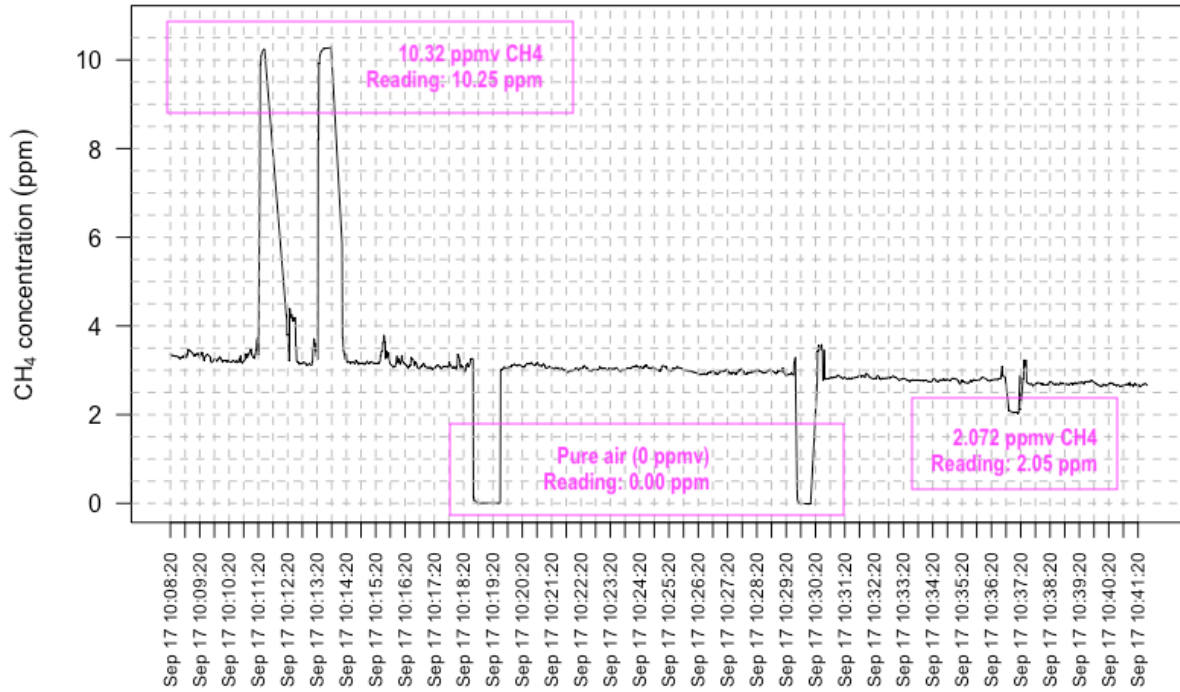

**Figure 21.** Testing the GasScouter

**S9 Appendix section 2: Picarro G2311-f Cavity Ring-Down Spectrometer (CRDS)**

We used a G2311-f for i) analyzing some the bag method air samples ii) metered control testing. The specification sheet [from Picarro](#) for the G2311-f is below.

**Table 6.** G2311-f performance specifications (copied directly from Picarro, Inc.)

| G2311-f Performance Specifications                                               | CO <sub>2</sub> | CH <sub>4</sub> | H <sub>2</sub> O                                     |
|----------------------------------------------------------------------------------|-----------------|-----------------|------------------------------------------------------|
| <b>Flux Modes</b>                                                                |                 |                 |                                                      |
| 3-Species Precision (10Hz, 1-σ)                                                  | ≤200 ppb        | ≤3 ppb          | ≤6 ppm + 0.3% of reading                             |
| Max Drift at STP over 24 Hours/1 Month<br><i>*Max - Min of 50 minute average</i> | ≤250/500 ppb    | ≤2.5/3 ppb      | ≤10 ppm + 0.3% of reading                            |
| 2-Species Precision (10 Hz, 1-σ)                                                 | ≤110 ppb        | N/A             | ≤6 ppm + 0.3% of reading                             |
| Measurement Rate                                                                 | ≥10 Hz          | ≥10 Hz          | ≥10 Hz                                               |
| Gas Response in Cell                                                             | ≥5 Hz           | ≥5 Hz           | ≥5 Hz                                                |
| <b>Precision Mode</b>                                                            |                 |                 |                                                      |
| Precision (1-σ of Raw, 5 sec/5 min averaged data)                                | ≤150/50 ppb     | ≤1/0.7 ppb      | ≤6 ppm + 0.3% of reading                             |
| Max Drift at STP over 24 Hours/1 Month<br><i>*Max - Min of 50 minute average</i> | ≤150/500 ppb    | ≤1/3 ppb        | ≤10 ppm + 0.3% of reading                            |
| Measurement Rate                                                                 | ≥0.2 Hz         | ≥0.2 Hz         | 0-3% (non-condensing)                                |
| Gas Response in Cell                                                             | ≥0.33 Hz        | ≥0.33 Hz        | ≥0.33 Hz                                             |
| <b>All Modes</b>                                                                 |                 |                 |                                                      |
| Guaranteed Specifications Range                                                  | 300-500 ppm     | 1-3 ppm         | 0-3 %v H <sub>2</sub> O 25°C dew pt (non-condensing) |
| Operating Range                                                                  | 0-1000 ppm      | 0-20 ppm        | 0-7 %v H <sub>2</sub> O 39°C dew pt (non-condensing) |

We performed quality control tests using 3 different test gasses on September 17 2022. To test the G2311-f, a Tedlar bag was fully evacuated and filled with a test gas. The bag was then attached to the G2311-f intake. The G2311-f measured CH<sub>4</sub> concentrations to within 0.4% of test gasses as shown below.

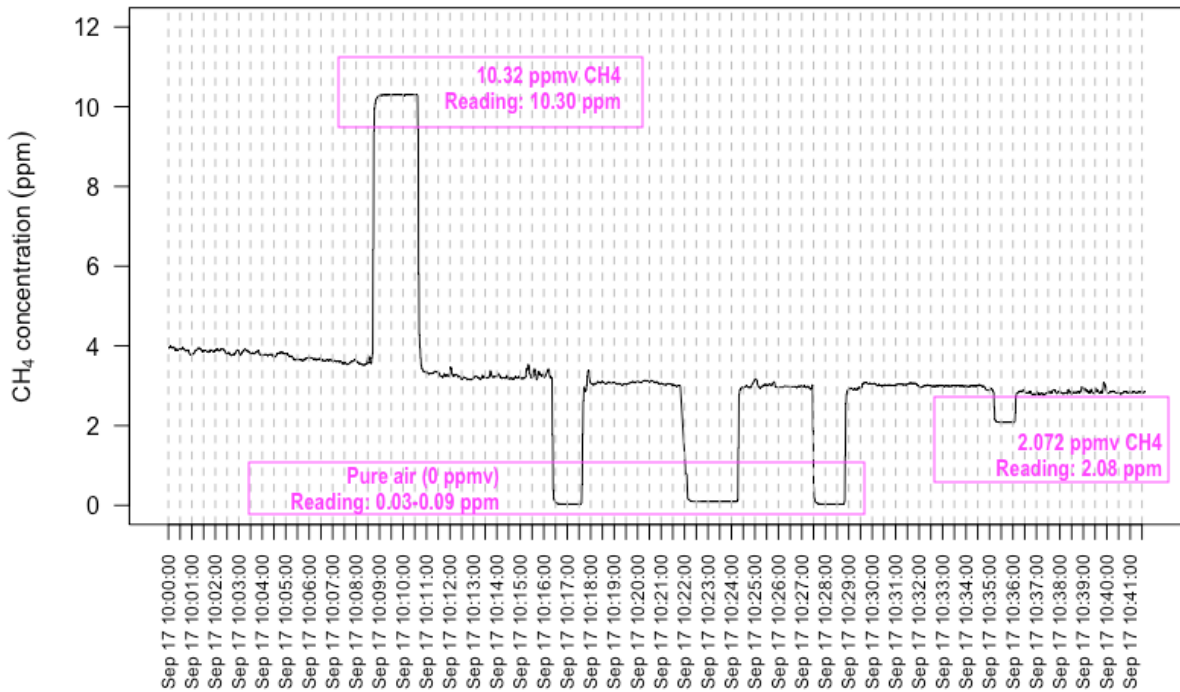

Figure 22. Testing the G2311-f

### **S9 Appendix section 3: Bascom-Turner Gas-Rover VG211 Portable Combustible Gas Indicator (CGI)**

We used a Gas-Rover in Survey mode for indoor leak surveying. The Gas-Rover has the following CH<sub>4</sub>-related specifications:

- CH<sub>4</sub> Sensors: Dual Catalytic Combustion
- Detection ranges: 0 to 10000 ppmv CH<sub>4</sub> by volume, 0 to 100% CH<sub>4</sub> by volume
- Accuracy of detection: 2% of reading +/- 20 ppmv; +/- 0.1% to 5%; +/-2.0% to 100 vol %
- Measurement resolution: 1 ppmv from 0 to 40000 ppmv; 0.05 vol % from 0 to 5 vol %; 1.0 vol % from 5 to 100 vol %

More details can be found [here](#).

We calibrated the Gas-Rover using 2.5% CH<sub>4</sub> calibration gas from Bascom-Turner (part number MC-105) on Jul 13 2022, September 14 2022, September 19 2022 and on September 28 2022.
